# Supplementary material for: Ectopic Expression of Poplar ABC Transporter PtoABCG36 Confers Cd Tolerance in Arabidopsis thaliana
Source: PubMed Central journal article supplement (PMC6652139; doi:10.3390/ijms20133293), 2019-07-04
Supplement: ijms-20-03293-s001.pdf [file ijms-20-03293-s001.pdf]

### Supplementary Table S1

The list of primers used in PCR reactions

| Gene name            | Primer sequences (5'→3')                                                       | Usage                   |
|----------------------|--------------------------------------------------------------------------------|-------------------------|
| <i>PtoABCG36</i>     | FP-1: CGCGGATCCATGGACGGCGTAGAGAGAGCT<br>RP-1: CGCGGATCCTCTTGTCTGGAAGTTCAGTGTCC | Primers for cloning     |
| <i>PtoABCG36</i>     | FP-2: GGACTAGTATGGACGGCGTAGAGAGAGCT<br>RP-2: TCCCCCGGGCTATCTTGTCTGGAAGTTCAGTG  | Primers for yeast assay |
| <i>PtoABCG36</i>     | FP-3: CATTACCCTATGCCATTGCAC<br>RP-3: TCTTGTCTGGAAGTTCAGTGTC                    | PCR analysis            |
| <i>PtoABCG36</i>     | FP-4: CAAGTGGTGGGTCTGGTAC<br>RP-4: CTTGTCTGGAAGTTCAGTGTC                       | Quantitative PCR        |
| <i>AtActin-1</i>     | FP-5: TGGTCGTACAACCGGTATTG<br>RP-5: CATACTCGGCCTTGGAGATC                       | Quantitative PCR        |
| <i>UBQ(FJ438462)</i> | FP-6: GGAAGCTGCTGGTATCCACGAGAC<br>RP-6: GCTGGAAGGTGCTGAGAGATGC                 | Quantitative PCR        |

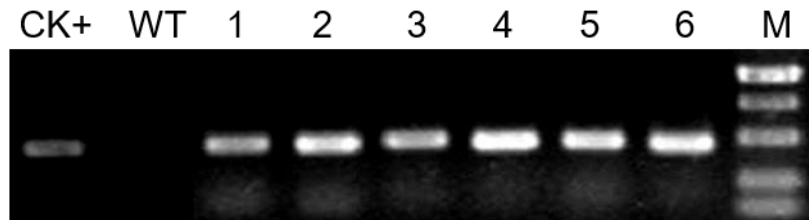

**Figure S1.** PCR analysis of *PtoABCG36*-overexpressing plants. Identification of *PtoABCG36* transgenic Arabidopsis plants. CK+, positive control; WT, wild type; 1-6, transgenic Arabidopsis lines; M, DNA ladder.

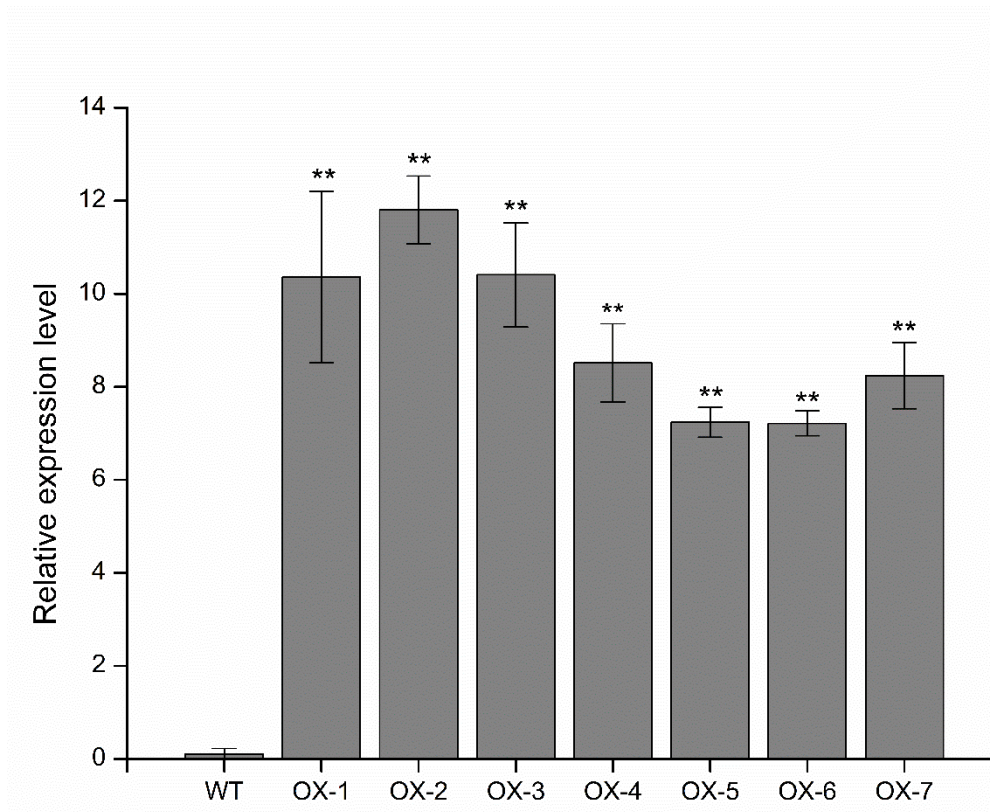

**Figure S2.** Relative expression level of *PtoABCG36*-overexpressing Arabidopsis plants. WT, Arabidopsis wild type; OX-1, OX-2, OX-3, OX-4, OX-5, OX-6 and OX-7, different transgenic Arabidopsis lines.
